# Supplementary material for: Correlation between Reversal of DNA Methylation and Clinical Symptoms in Psoriatic Epidermis Following Narrow-Band UVB Phototherapy
Source: PubMed Central journal article supplement — J Invest Dermatol. 2015 Apr 30;135(8):2077–83. doi: 10.1038/jid.2015.128 (PMC4580729; doi:10.1038/jid.2015.128), 2015-04-30

# SUPPLEMENTARY DATA

**Table S1**

**List of top 100 phototherapy affected MVPs (SAM procedure with 5% false discovery rate)**

**Increased methylation level following phototherapy**

| probeID    | gene      | feat.rel     | ENHANCER | CONTROL | PRE-UV | MID-UV | POST-UV | Delta-beta<br>(POST-UV vs.<br>PRE-UV) |
|------------|-----------|--------------|----------|---------|--------|--------|---------|---------------------------------------|
| cg10409253 | RNF216    | Body_none    | NA       | 0.87    | 0.20   | 0.37   | 0.57    | 0.37                                  |
| cg16139316 | S100A9    | 5'UTR_none   | NA       | 0.92    | 0.34   | 0.51   | 0.67    | 0.34                                  |
| cg11842073 | NA        | IGR_none     | TRUE     | 0.79    | 0.23   | 0.38   | 0.57    | 0.34                                  |
| cg05435212 | NA        | IGR_none     | TRUE     | 0.78    | 0.16   | 0.30   | 0.49    | 0.33                                  |
| cg20950277 | TNIP3     | 1stExon_none | NA       | 0.81    | 0.36   | 0.50   | 0.67    | 0.31                                  |
| cg03035162 | NA        | IGR_none     | NA       | 0.88    | 0.31   | 0.48   | 0.62    | 0.31                                  |
| cg07964527 | PDE8A     | Body_none    | TRUE     | 0.83    | 0.31   | 0.47   | 0.61    | 0.31                                  |
| cg23598352 | C9orf46   | 5'UTR_shore  | NA       | 0.90    | 0.30   | 0.49   | 0.61    | 0.30                                  |
| cg27431500 | HN1L      | Body_none    | NA       | 0.83    | 0.31   | 0.41   | 0.61    | 0.30                                  |
| cg24544808 | NA        | IGR_none     | TRUE     | 0.74    | 0.22   | 0.38   | 0.52    | 0.30                                  |
| cg22946974 | SPRR2F    | 5'UTR_none   | NA       | 0.89    | 0.42   | 0.60   | 0.71    | 0.29                                  |
| cg07651316 | BTBD12    | Body_shelf   | NA       | 0.92    | 0.44   | 0.61   | 0.73    | 0.29                                  |
| cg05586676 | VNN1      | Body_none    | TRUE     | 0.79    | 0.34   | 0.46   | 0.63    | 0.29                                  |
| cg05976283 | NA        | IGR_shelf    | NA       | 0.84    | 0.31   | 0.46   | 0.60    | 0.29                                  |
| cg04087571 | SIK3      | Body_none    | TRUE     | 0.71    | 0.13   | 0.25   | 0.41    | 0.28                                  |
| cg27250032 | NA        | IGR_shelf    | NA       | 0.80    | 0.25   | 0.39   | 0.53    | 0.28                                  |
| cg04961225 | NA        | IGR_none     | TRUE     | 0.90    | 0.37   | 0.57   | 0.65    | 0.28                                  |
| cg25367999 | NA        | IGR_none     | TRUE     | 0.91    | 0.36   | 0.50   | 0.64    | 0.28                                  |
| cg19913971 | TNIP3     | 5'UTR_none   | NA       | 0.87    | 0.41   | 0.53   | 0.69    | 0.28                                  |
| cg08550523 | NA        | IGR_none     | TRUE     | 0.83    | 0.35   | 0.46   | 0.62    | 0.28                                  |
| cg01655008 | C14orf109 | Body_shore   | NA       | 0.89    | 0.38   | 0.52   | 0.66    | 0.27                                  |
| cg21761639 | NA        | IGR_none     | TRUE     | 0.61    | 0.20   | 0.34   | 0.47    | 0.27                                  |
| cg19846154 | NA        | IGR_none     | TRUE     | 0.82    | 0.26   | 0.40   | 0.53    | 0.27                                  |
| cg21890646 | CCDC88C   | Body_none    | TRUE     | 0.74    | 0.21   | 0.34   | 0.48    | 0.27                                  |
| cg20169988 | S100A9    | Body_none    | NA       | 0.92    | 0.44   | 0.58   | 0.71    | 0.27                                  |
| cg00859858 | ZC3H12A   | Body_shelf   | TRUE     | 0.76    | 0.19   | 0.31   | 0.46    | 0.27                                  |
| cg16125375 | PPP2R2B   | 5'UTR_none   | TRUE     | 0.85    | 0.35   | 0.46   | 0.62    | 0.27                                  |
| cg16565031 | NA        | IGR_none     | TRUE     | 0.63    | 0.13   | 0.24   | 0.39    | 0.27                                  |
| cg01973676 | CUX1      | Body_none    | TRUE     | 0.85    | 0.25   | 0.37   | 0.51    | 0.26                                  |
| cg12067024 | S100A7A   | TSS1500_none | NA       | 0.65    | 0.22   | 0.32   | 0.49    | 0.26                                  |
| cg10649130 | NA        | IGR_shelf    | NA       | 0.77    | 0.24   | 0.36   | 0.50    | 0.26                                  |
| cg04446653 | NA        | IGR_none     | TRUE     | 0.72    | 0.23   | 0.38   | 0.49    | 0.26                                  |
| cg13430755 | NA        | IGR_none     | TRUE     | 0.80    | 0.29   | 0.40   | 0.55    | 0.26                                  |
| cg24870231 | NA        | IGR_none     | TRUE     | 0.88    | 0.35   | 0.44   | 0.61    | 0.26                                  |
| cg24681845 | NA        | IGR_none     | NA       | 0.62    | 0.17   | 0.26   | 0.43    | 0.26                                  |
| cg04076286 | NA        | IGR_shore    | NA       | 0.74    | 0.25   | 0.35   | 0.51    | 0.26                                  |
| cg18477001 | NA        | IGR_none     | TRUE     | 0.88    | 0.45   | 0.60   | 0.71    | 0.26                                  |
| cg22373770 | NA        | IGR_none     | TRUE     | 0.79    | 0.24   | 0.35   | 0.50    | 0.26                                  |

|            |         |               |      |      |      |      |      |      |
|------------|---------|---------------|------|------|------|------|------|------|
| cg20949198 | SLC2A12 | Body_none     | TRUE | 0.92 | 0.49 | 0.66 | 0.74 | 0.26 |
| cg18318006 | SORBS1  | Body_none     | TRUE | 0.81 | 0.38 | 0.54 | 0.64 | 0.26 |
| cg18766755 | SPRR2A  | 5'UTR_none    | NA   | 0.86 | 0.46 | 0.63 | 0.72 | 0.26 |
| cg25890168 | ABHD3   | Body_none     | TRUE | 0.70 | 0.26 | 0.40 | 0.51 | 0.25 |
| cg03518729 | NA      | IGR_none      | TRUE | 0.78 | 0.37 | 0.45 | 0.63 | 0.25 |
| cg15975676 | GPATCH2 | Body_none     | TRUE | 0.91 | 0.43 | 0.53 | 0.69 | 0.25 |
| cg24004483 | NA      | IGR_shelf     | NA   | 0.87 | 0.43 | 0.58 | 0.69 | 0.25 |
| cg20232662 | NA      | IGR_none      | NA   | 0.81 | 0.42 | 0.53 | 0.67 | 0.25 |
| cg24687805 | RAB27A  | Body_none     | TRUE | 0.54 | 0.06 | 0.14 | 0.31 | 0.25 |
| cg27092594 | NA      | IGR_none      | NA   | 0.81 | 0.30 | 0.41 | 0.55 | 0.25 |
| cg18721397 | SUB1    | TSS1500_shore | NA   | 0.84 | 0.37 | 0.50 | 0.62 | 0.25 |
| cg02284278 | NA      | IGR_none      | TRUE | 0.86 | 0.41 | 0.52 | 0.66 | 0.25 |

### Decreased methylation level following phototherapy

| probeID    | gene     | feat.rel      | ENHANCER | CONTROL | PRE-UV | MID-UV | POST-UV | Delta-beta<br>(POST-UV vs.<br>PRE-UV) |
|------------|----------|---------------|----------|---------|--------|--------|---------|---------------------------------------|
| cg23999170 | TSPAN2   | Body_shelf    | NA       | 0.14    | 0.64   | 0.53   | 0.38    | -0.26                                 |
| cg17251713 | SERPINB7 | 5'UTR_none    | NA       | 0.20    | 0.63   | 0.43   | 0.38    | -0.25                                 |
| cg08780218 | NA       | IGR_shelf     | NA       | 0.12    | 0.59   | 0.48   | 0.34    | -0.25                                 |
| cg24705426 | ATG7     | Body_none     | TRUE     | 0.35    | 0.78   | 0.66   | 0.56    | -0.22                                 |
| cg00593243 | DUSP1    | Body_shore    | NA       | 0.12    | 0.49   | 0.38   | 0.26    | -0.22                                 |
| cg09545579 | BAHCC1   | Body_island   | TRUE     | 0.19    | 0.60   | 0.52   | 0.39    | -0.21                                 |
| cg22801217 | TSPO2    | TSS200_none   | NA       | 0.34    | 0.80   | 0.67   | 0.58    | -0.21                                 |
| cg00150245 | NA       | IGR_shelf     | NA       | 0.33    | 0.78   | 0.66   | 0.56    | -0.21                                 |
| cg13001097 | UTRN     | Body_none     | TRUE     | 0.12    | 0.54   | 0.38   | 0.33    | -0.21                                 |
| cg18421360 | GPR98    | Body_none     | TRUE     | 0.22    | 0.80   | 0.68   | 0.59    | -0.21                                 |
| cg04071398 | IL20RA   | Body_shore    | NA       | 0.19    | 0.63   | 0.56   | 0.43    | -0.21                                 |
| cg02711479 | STK40    | 5'UTR_shelf   | NA       | 0.19    | 0.60   | 0.51   | 0.40    | -0.20                                 |
| cg18752854 | TNS1     | TSS1500_none  | NA       | 0.25    | 0.60   | 0.45   | 0.40    | -0.20                                 |
| cg13983640 | TSPO2    | TSS1500_none  | NA       | 0.29    | 0.68   | 0.58   | 0.47    | -0.20                                 |
| cg21713780 | CHSY1    | Body_none     | TRUE     | 0.40    | 0.73   | 0.63   | 0.54    | -0.20                                 |
| cg16312609 | NA       | IGR_none      | TRUE     | 0.35    | 0.67   | 0.58   | 0.47    | -0.20                                 |
| cg10198568 | FRMD4A   | Body_none     | TRUE     | 0.24    | 0.64   | 0.53   | 0.45    | -0.20                                 |
| cg02084912 | C3orf42  | TSS1500_none  | NA       | 0.15    | 0.58   | 0.45   | 0.39    | -0.20                                 |
| cg19370858 | NA       | IGR_shelf     | NA       | 0.30    | 0.74   | 0.61   | 0.54    | -0.20                                 |
| cg00283857 | ZDHHC14  | Body_shelf    | TRUE     | 0.39    | 0.79   | 0.69   | 0.60    | -0.20                                 |
| cg17445490 | ECE1     | Body_none     | TRUE     | 0.24    | 0.74   | 0.64   | 0.55    | -0.19                                 |
| cg02189597 | RORA     | Body_shelf    | NA       | 0.39    | 0.68   | 0.56   | 0.49    | -0.19                                 |
| cg05484949 | NA       | IGR_none      | NA       | 0.28    | 0.64   | 0.55   | 0.45    | -0.19                                 |
| cg19221542 | NA       | IGR_shore     | NA       | 0.24    | 0.57   | 0.49   | 0.38    | -0.19                                 |
| cg04091816 | PDK2     | Body_shelf    | TRUE     | 0.32    | 0.69   | 0.61   | 0.50    | -0.19                                 |
| cg26777809 | LRRC1    | Body_none     | TRUE     | 0.24    | 0.65   | 0.55   | 0.46    | -0.19                                 |
| cg06641366 | LRRC8C   | TSS1500_shore | NA       | 0.28    | 0.75   | 0.66   | 0.56    | -0.19                                 |
| cg19192626 | NA       | IGR_none      | NA       | 0.13    | 0.48   | 0.38   | 0.29    | -0.19                                 |
| cg20377447 | TSPO2    | TSS1500_none  | NA       | 0.29    | 0.66   | 0.56   | 0.47    | -0.19                                 |
| cg05168580 | C14orf73 | Body_shore    | NA       | 0.28    | 0.60   | 0.49   | 0.41    | -0.19                                 |
| cg05234415 | PPP1R14A | Body_shelf    | TRUE     | 0.36    | 0.70   | 0.58   | 0.51    | -0.19                                 |
| cg22821554 | CYP3A4   | TSS1500_none  | NA       | 0.32    | 0.71   | 0.52   | 0.52    | -0.19                                 |
| cg07803375 | HEATR2   | Body_shelf    | TRUE     | 0.31    | 0.67   | 0.58   | 0.48    | -0.19                                 |
| cg25533211 | TSPO2    | TSS1500_none  | NA       | 0.24    | 0.59   | 0.51   | 0.40    | -0.19                                 |
| cg04272613 | DAAM1    | 5'UTR_none    | TRUE     | 0.14    | 0.49   | 0.36   | 0.31    | -0.19                                 |
| cg05021291 | NA       | IGR_none      | TRUE     | 0.29    | 0.68   | 0.56   | 0.49    | -0.19                                 |

|            |          |             |      |      |      |      |      |       |
|------------|----------|-------------|------|------|------|------|------|-------|
| cg06935361 | BRCA2    | Body_none   | TRUE | 0.34 | 0.74 | 0.65 | 0.55 | -0.19 |
| cg10624729 | FAM73A   | Body_none   | TRUE | 0.20 | 0.62 | 0.49 | 0.43 | -0.18 |
| cg27529668 | SLC38A10 | Body_none   | NA   | 0.20 | 0.58 | 0.51 | 0.40 | -0.18 |
| cg03700171 | IREB2    | Body_none   | TRUE | 0.23 | 0.60 | 0.54 | 0.42 | -0.18 |
| cg17801930 | NA       | IGR_none    | TRUE | 0.42 | 0.80 | 0.62 | 0.62 | -0.18 |
| cg26528531 | PCDH7    | Body_none   | TRUE | 0.51 | 0.87 | 0.72 | 0.68 | -0.18 |
| cg05524458 | ANKRD33B | Body_shore  | TRUE | 0.50 | 0.87 | 0.77 | 0.68 | -0.18 |
| cg18634175 | ITGB5    | Body_none   | TRUE | 0.31 | 0.72 | 0.61 | 0.54 | -0.18 |
| cg22609908 | NA       | IGR_shelf   | NA   | 0.22 | 0.55 | 0.43 | 0.37 | -0.18 |
| cg01821452 | NA       | IGR_none    | TRUE | 0.45 | 0.75 | 0.65 | 0.57 | -0.18 |
| cg18263455 | MIR548H4 | Body_none   | TRUE | 0.23 | 0.71 | 0.58 | 0.53 | -0.18 |
| cg04723449 | COG7     | Body_none   | TRUE | 0.23 | 0.67 | 0.52 | 0.50 | -0.18 |
| cg10221596 | ALS2CR12 | TSS200_none | NA   | 0.49 | 0.72 | 0.66 | 0.54 | -0.18 |
| cg15881795 | NA       | IGR_none    | TRUE | 0.37 | 0.78 | 0.66 | 0.60 | -0.18 |

**Table S2**

**DAVID functional annotation clustering analysis for 2108 phototherapy affected MVPs**

| <b>Annotation Cluster 1</b> | <b>Enrichment Score: 4.96</b>                   | <b>Count</b> | <b>P_Value</b> | <b>Benjamini</b> |
|-----------------------------|-------------------------------------------------|--------------|----------------|------------------|
| GOTERM_BP_FAT               | inflammatory response                           | 42           | 5.50E-07       | 1.70E-03         |
| GOTERM_BP_FAT               | defense response                                | 59           | 3.80E-05       | 2.30E-02         |
| GOTERM_BP_FAT               | response to wounding                            | 52           | 6.60E-05       | 2.80E-02         |
| <b>Annotation Cluster 2</b> | <b>Enrichment Score: 4.05</b>                   | <b>Count</b> | <b>P_Value</b> | <b>Benjamini</b> |
| GOTERM_BP_FAT               | cytoskeleton organization                       | 47           | 1.60E-05       | 1.60E-02         |
| GOTERM_BP_FAT               | actin filament-based process                    | 29           | 1.50E-04       | 4.40E-02         |
| GOTERM_BP_FAT               | actin cytoskeleton organization                 | 27           | 2.90E-04       | 4.40E-02         |
| <b>Annotation Cluster 3</b> | <b>Enrichment Score: 2.92</b>                   | <b>Count</b> | <b>P_Value</b> | <b>Benjamini</b> |
| GOTERM_BP_FAT               | response to hormone stimulus                    | 40           | 6.00E-05       | 3.00E-02         |
| GOTERM_BP_FAT               | cellular response to hormone stimulus           | 20           | 1.20E-04       | 4.40E-02         |
| GOTERM_BP_FAT               | response to endogenous stimulus                 | 41           | 2.40E-04       | 4.40E-02         |
| GOTERM_BP_FAT               | response to organic substance                   | 63           | 2.90E-04       | 4.60E-02         |
| GOTERM_BP_FAT               | insulin receptor signaling pathway              | 8            | 3.60E-03       | 2.00E-01         |
| GOTERM_BP_FAT               | response to peptide hormone stimulus            | 17           | 1.10E-02       | 3.60E-01         |
| GOTERM_BP_FAT               | cellular response to insulin stimulus           | 10           | 1.20E-02       | 3.70E-01         |
| GOTERM_BP_FAT               | response to insulin stimulus                    | 12           | 2.10E-02       | 4.70E-01         |
| <b>Annotation Cluster 4</b> | <b>Enrichment Score: 2.91</b>                   | <b>Count</b> | <b>P_Value</b> | <b>Benjamini</b> |
| GOTERM_BP_FAT               | regulation of cell motion                       | 25           | 1.50E-04       | 4.10E-02         |
| GOTERM_BP_FAT               | regulation of locomotion                        | 23           | 8.80E-04       | 8.80E-02         |
| GOTERM_BP_FAT               | regulation of cell migration                    | 21           | 9.90E-04       | 9.30E-02         |
| GOTERM_BP_FAT               | positive regulation of locomotion               | 14           | 2.70E-03       | 1.80E-01         |
| GOTERM_BP_FAT               | positive regulation of cell motion              | 14           | 2.70E-03       | 1.80E-01         |
| GOTERM_BP_FAT               | positive regulation of cell migration           | 13           | 3.40E-03       | 1.90E-01         |
| <b>Annotation Cluster 5</b> | <b>Enrichment Score: 2.79</b>                   | <b>Count</b> | <b>P_Value</b> | <b>Benjamini</b> |
| GOTERM_BP_FAT               | regulation of programmed cell death             | 70           | 1.80E-04       | 4.20E-02         |
| GOTERM_BP_FAT               | regulation of cell death                        | 70           | 2.10E-04       | 4.40E-02         |
| GOTERM_BP_FAT               | regulation of apoptosis                         | 69           | 2.30E-04       | 4.60E-02         |
| GOTERM_BP_FAT               | apoptosis                                       | 55           | 2.50E-04       | 4.40E-02         |
| GOTERM_BP_FAT               | cell death                                      | 63           | 2.60E-04       | 4.30E-02         |
| GOTERM_BP_FAT               | death                                           | 63           | 3.20E-04       | 4.50E-02         |
| GOTERM_BP_FAT               | programmed cell death                           | 55           | 3.60E-04       | 4.70E-02         |
| GOTERM_BP_FAT               | positive regulation of programmed cell death    | 42           | 4.70E-04       | 5.70E-02         |
| GOTERM_BP_FAT               | positive regulation of cell death               | 42           | 5.20E-04       | 6.10E-02         |
| GOTERM_BP_FAT               | positive regulation of apoptosis                | 41           | 7.90E-04       | 8.20E-02         |
| GOTERM_BP_FAT               | induction of programmed cell death              | 31           | 3.20E-03       | 1.90E-01         |
| GOTERM_BP_FAT               | induction of apoptosis by extracellular signals | 15           | 3.30E-03       | 1.90E-01         |
| GOTERM_BP_FAT               | induction of apoptosis                          | 30           | 5.70E-03       | 2.60E-01         |
| GOTERM_BP_FAT               | negative regulation of programmed cell death    | 30           | 2.40E-02       | 5.00E-01         |
| GOTERM_BP_FAT               | negative regulation of cell death               | 30           | 2.50E-02       | 5.00E-01         |
| GOTERM_BP_FAT               | negative regulation of apoptosis                | 29           | 3.40E-02       | 5.50E-01         |
| GOTERM_BP_FAT               | anti-apoptosis                                  | 15           | 2.40E-01       | 9.10E-01         |

**Table S3****Overall methylation improvement at the end of phototherapy based on 2108 MVPs**

| Clinical improvement                                      | Excellent |        |       |       |       |       |       | Good  |       | Unsatisfactory |      |
|-----------------------------------------------------------|-----------|--------|-------|-------|-------|-------|-------|-------|-------|----------------|------|
|                                                           | P2        | P3     | P4    | P8    | P10   | P11   | P12   | P1    | P9    | P6             | P7   |
| % methylation improvement (POST-UV vs. PRE-UV, increased) | 109.39    | 136.00 | 11.36 | 38.62 | 93.25 | 30.54 | 71.13 | 62.00 | 14.66 | 11.52          | 9.40 |
| % methylation improvement (POST-UV vs. PRE-UV, decreased) | 40.15     | 27.94  | 10.01 | 10.70 | 48.27 | 42.49 | 15.92 | 38.56 | 5.92  | 4.88           | 5.71 |
| Absolute methylation difference (POST-UV vs. Control)     | 0.15      | 0.11   | 0.16  | 0.12  | 0.07  | 0.07  | 0.16  | 0.09  | 0.37  | 0.30           | 0.33 |

**Table S4**

**List of MVPs that responded to phototherapy and strongly correlated with gene expression**

| ProbeID    | Gene symbol | Correlation r * | Enhancer | Feat.rel      | CONTROL | PRE-UV | MID-UV | POST-UV |
|------------|-------------|-----------------|----------|---------------|---------|--------|--------|---------|
| cg06355720 | S100A9      | -0.8898         | NA       | 3'UTR_none    | 0.93    | 0.52   | 0.67   | 0.76    |
| cg20169988 | S100A9      | -0.8717         | NA       | Body_none     | 0.92    | 0.44   | 0.58   | 0.71    |
| cg16139316 | S100A9      | -0.8701         | NA       | 5'UTR_none    | 0.92    | 0.34   | 0.51   | 0.67    |
| cg22952459 | C10orf99    | -0.8683         | NA       | TSS1500_none  | 0.82    | 0.48   | 0.57   | 0.66    |
| cg23092820 | S100A9      | -0.8679         | NA       | TSS1500_none  | 0.86    | 0.61   | 0.69   | 0.73    |
| cg20161089 | IFI27       | -0.8627         | NA       | 5'UTR_none    | 0.91    | 0.44   | 0.53   | 0.68    |
| cg15467116 | S100A9      | -0.8545         | NA       | Body_none     | 0.95    | 0.73   | 0.82   | 0.85    |
| cg03165378 | S100A9      | -0.8517         | NA       | TSS1500_none  | 0.86    | 0.48   | 0.59   | 0.67    |
| cg03514239 | S100A9      | -0.8409         | NA       | TSS1500_none  | 0.49    | 0.17   | 0.23   | 0.30    |
| cg01431057 | S100A8      | -0.8344         | NA       | Body_none     | 0.64    | 0.20   | 0.29   | 0.43    |
| cg22946974 | SPRR2F      | -0.8334         | NA       | 5'UTR_none    | 0.89    | 0.42   | 0.60   | 0.71    |
| cg18766755 | SPRR2A      | -0.8177         | NA       | 5'UTR_none    | 0.86    | 0.46   | 0.63   | 0.72    |
| cg04112417 | VSNL1       | -0.8108         | TRUE     | Body_none     | 0.74    | 0.41   | 0.47   | 0.57    |
| cg03404572 | SERPINB3    | -0.8015         | NA       | TSS200_none   | 0.68    | 0.22   | 0.28   | 0.38    |
| cg22204954 | SPRR2F      | -0.7929         | NA       | TSS200_none   | 0.56    | 0.16   | 0.27   | 0.36    |
| cg02892624 | S100A7      | -0.7875         | NA       | 5'UTR_none    | 0.89    | 0.60   | 0.71   | 0.76    |
| cg09174555 | S100A8      | -0.7870         | NA       | TSS1500_none  | 0.43    | 0.16   | 0.22   | 0.31    |
| cg07290257 | LASS6       | -0.7830         | TRUE     | Body_none     | 0.40    | 0.76   | 0.61   | 0.59    |
| cg08036899 | IFI27       | -0.7792         | NA       | 5'UTR_none    | 0.93    | 0.68   | 0.74   | 0.82    |
| cg20335425 | S100A8      | -0.7732         | NA       | 5'UTR_none    | 0.49    | 0.19   | 0.24   | 0.35    |
| cg22933439 | S100A7A     | -0.7683         | NA       | TSS1500_none  | 0.79    | 0.53   | 0.64   | 0.71    |
| cg00859858 | ZC3H12A     | -0.7662         | TRUE     | Body_shelf    | 0.76    | 0.19   | 0.31   | 0.46    |
| cg04452195 | GJB2        | -0.7659         | NA       | 3'UTR_shelf   | 0.83    | 0.43   | 0.52   | 0.66    |
| cg18443806 | IFI27       | -0.7612         | NA       | TSS1500_none  | 0.87    | 0.62   | 0.69   | 0.77    |
| cg18145090 | GJB6        | -0.7445         | NA       | 5'UTR_shore   | 0.84    | 0.56   | 0.61   | 0.69    |
| cg26127113 | CGNL1       | -0.7427         | TRUE     | Body_none     | 0.30    | 0.75   | 0.59   | 0.57    |
| cg04880990 | KRT6A       | -0.7377         | NA       | TSS1500_none  | 0.71    | 0.33   | 0.41   | 0.51    |
| cg22377389 | GJB6        | -0.7371         | TRUE     | 5'UTR_shore   | 0.49    | 0.21   | 0.28   | 0.36    |
| cg17304678 | RGMB        | -0.7360         | TRUE     | Body_none     | 0.18    | 0.54   | 0.43   | 0.40    |
| cg24036517 | SOX7        | -0.7335         | NA       | Body_shore    | 0.71    | 0.34   | 0.43   | 0.50    |
| cg24790676 | KLK10       | -0.7324         | NA       | TSS1500_shore | 0.75    | 0.53   | 0.60   | 0.63    |
| cg07798731 | C10orf99    | -0.7322         | NA       | TSS1500_none  | 0.46    | 0.23   | 0.29   | 0.36    |
| cg01440333 | CHI3L2      | -0.7282         | NA       | TSS200_none   | 0.46    | 0.25   | 0.31   | 0.39    |
| cg20393620 | SGK1        | -0.7272         | TRUE     | Body_none     | 0.82    | 0.41   | 0.53   | 0.64    |
| cg07813495 | ZC3H12A     | -0.7256         | NA       | Body_none     | 0.54    | 0.27   | 0.35   | 0.41    |
| cg20256009 | S100A8      | -0.7210         | NA       | 5'UTR_none    | 0.36    | 0.11   | 0.12   | 0.22    |
| cg06051311 | TRIM15      | -0.7166         | TRUE     | 5'UTR_none    | 0.83    | 0.52   | 0.62   | 0.67    |
| cg03473518 | GJB6        | -0.7161         | TRUE     | 5'UTR_shore   | 0.50    | 0.22   | 0.28   | 0.37    |
| cg15662902 | TNNI2       | -0.7160         | NA       | TSS1500_none  | 0.40    | 0.65   | 0.58   | 0.50    |
| cg12869351 | GJB2        | -0.7137         | NA       | 5'UTR_shelf   | 0.95    | 0.63   | 0.70   | 0.83    |
| cg12067024 | S100A7A     | -0.7135         | NA       | TSS1500_none  | 0.65    | 0.22   | 0.32   | 0.49    |
| cg01011918 | SPRR2D      | -0.7131         | NA       | 1stExon_none  | 0.81    | 0.40   | 0.47   | 0.56    |
| cg26808583 | S100A12     | -0.7118         | NA       | Body_none     | 0.89    | 0.67   | 0.74   | 0.78    |
| cg27229484 | ZC3H12A     | -0.7106         | NA       | Body_none     | 0.61    | 0.23   | 0.33   | 0.42    |

|            |         |         |      |              |      |      |      |      |
|------------|---------|---------|------|--------------|------|------|------|------|
| cg17496887 | S100A7A | -0.7081 | NA   | TSS1500_none | 0.61 | 0.17 | 0.22 | 0.33 |
| cg11668844 | MCF2L   | -0.7068 | TRUE | Body_shore   | 0.14 | 0.56 | 0.47 | 0.42 |
| cg18116418 | LCE3D   | -0.7054 | NA   | TSS1500_none | 0.58 | 0.33 | 0.40 | 0.45 |
| cg17967059 | GJB2    | -0.7039 | NA   | Body_shelf   | 0.71 | 0.33 | 0.41 | 0.53 |
| cg00863378 | BBS2    | -0.7032 | NA   | Body_shelf   | 0.15 | 0.35 | 0.25 | 0.24 |
| cg00012692 | GJB6    | -0.7031 | TRUE | 5'UTR_shore  | 0.47 | 0.26 | 0.30 | 0.38 |
| cg25212571 | SPRR2C  | -0.7004 | NA   | TSS200_none  | 0.88 | 0.51 | 0.62 | 0.69 |
| cg11692307 | PLCH2   | 0.7381  | NA   | Body_none    | 0.75 | 0.39 | 0.45 | 0.55 |
| cg18318006 | SORBS1  | 0.7647  | TRUE | Body_none    | 0.81 | 0.38 | 0.54 | 0.64 |
| cg23553762 | GALNTL1 | 0.8721  | TRUE | Body_none    | 0.64 | 0.28 | 0.35 | 0.43 |

\*Correlation between levels of gene expression and DNA methylation (n=47)

**Table S5****Summary of feature and correlation with gene expression for 2108 MVPs**

|                  | Total MVPs (2108) |                                     |        | Enhancer-located MVPs (1098) |                                     |        |
|------------------|-------------------|-------------------------------------|--------|------------------------------|-------------------------------------|--------|
|                  | Count             | Count (strong/moderate correlation) | %      | Count                        | Count (strong/moderate correlation) | %      |
| <b>Promoter</b>  | 510               | 72                                  | 14.12% | 151                          | 17                                  | 11.26% |
| <b>Gene body</b> | 832               | 73                                  | 8.77%  | 460                          | 26                                  | 5.65%  |
| <b>3'UTR</b>     | 78                | 5                                   | 6.41%  | 14                           | 0                                   | 0      |
| <b>IGR</b>       | 688               | 0                                   | 0      | 473                          | 0                                   | 0      |
| <b>Total</b>     | 2108              | 150                                 | 7.12%  | 1098                         | 43                                  | 3.92%  |



**Table S6****Clinical data of twelve patients with psoriasis**

| <b>ID</b> | <b>Sex</b> | <b>Age</b> | <b>Psoriasis since</b> | <b>Biopsy site</b>   | <b>Localisation of lesions</b>    | <b>Skin type</b> | <b>Given dose</b>                             | <b>No of treatments</b> | <b>Response</b>           | <b>others</b>       |
|-----------|------------|------------|------------------------|----------------------|-----------------------------------|------------------|-----------------------------------------------|-------------------------|---------------------------|---------------------|
| 1         | M          | 40         | > 20 y                 | Buttocks, lower back | Whole body                        | I - II           | 0.3 – 1.4 J                                   | 34                      | Good                      |                     |
| 2         | F          | 73         | unknown                | Arms                 | Arms, back, soles, scalp          | III              | 0.3 – 2.0 J                                   | 20                      | Excellent                 |                     |
| 3         | M          | 59         | > 20 y                 | Thighs               | Legs, buttocks, left elbow, hands | III              | 0.3 – 1.7 J                                   | 23                      | Excellent                 | Hypertonia          |
| 4         | M          | 67         | < 1 y                  | Buttocks, thigh      | Elbows, legs, scalp, buttocks     | II - III         | 0.3 – 1.5 J                                   | 20                      | Excellent                 |                     |
| 5         | M          | 26         | ~1 y                   | Buttocks             | Legs, arms, scalp, face, buttocks | I – II           | 0.1 – 0.55 J                                  | 15<br>Stopped           | unknown (light sensitive) |                     |
| 6         | M          | 17         | > 10 y                 | Buttocks             | Whole body, scalp                 | IV               | 0.3 – 1.7 J<br>Stopped 3 weeks<br>0.9 – 1.3 J | 21                      | Unsatisfactory            |                     |
| 7         | F          | 47         | > 10 y                 | buttocks             | Whole body                        | I                | 0.3 – 2.2 J                                   | 23                      | Unsatisfactory            | Psoriatic arthritis |
| 8         | M          | 43         | > 10 y                 | buttocks             | Lower legs, arms, trunk           | III              | 0.3 – 2.6 J                                   | 25                      | Excellent                 |                     |
| 9         | F          | 46         | > 10 y                 | legs                 | Legs, elbows, hands               | III              | 0.3 – 2.6 J                                   | 30                      | Good                      | Psoriatic arthritis |
| 10        | F          | 74         | 2 y                    | buttocks             | Whole body                        | II               | 0.3 – 2.1 J                                   | 20                      | Excellent                 | Hypertonia          |
| 11        | F          | 33         | > 10 y                 | Buttocks             | Whole body                        | III              | 0.3 – 2.0 J                                   | 21                      | Excellent                 |                     |
| 12        | F          | 28         | > 10y                  | Buttocks             | Whole body                        | I                | 0.2 – 1.0 J                                   | 19                      | Excellent                 |                     |

**Table S7****Primers for OneStep qMethyl DNA methylation analysis**

| <b>ProbeID</b> | <b>Gene</b> | <b>Forward</b>       | <b>Reverse</b>       | <b>product size</b> |
|----------------|-------------|----------------------|----------------------|---------------------|
| cg20161089     | IFI27       | AAAGCTTCTGACCTGGAGCA | GGCTGCTTTCTTTCTCCTGA | 263 bp              |
| cg27431500     | HN1L        | AAACAGTCCAGCCTTGTGCT | TGCAAGGTGAAACAGGAAGA | 193 bp              |
| cg11802666     | IRF2        | ATGGAGGCTGAGAAGTCAA  | AGGGGTAGGATTGTGGCTTT | 175 bp              |
| cg04091816     | PDK2        | CTCATCCTCTCCCCTCCATT | GGCTGCTCAACAACCCTAGA | 178 bp              |

**Figure S1**

**Validation of 450K BeadChip data by OneStep qMethyl analysis. Four CpG sites were selected for data validation. Results from two methods were consistent based on Pearson's correlation coefficient (r).**

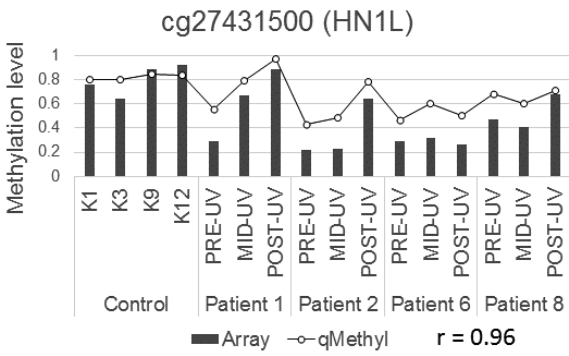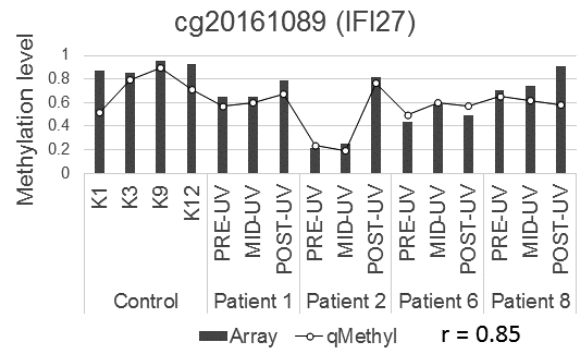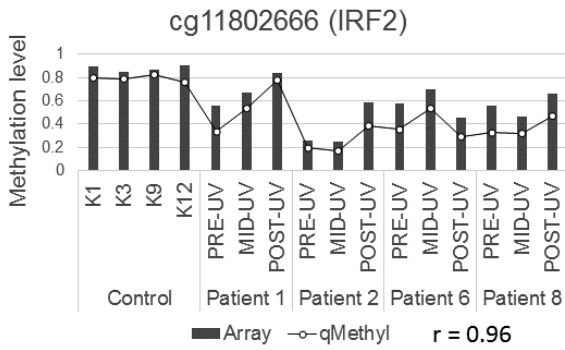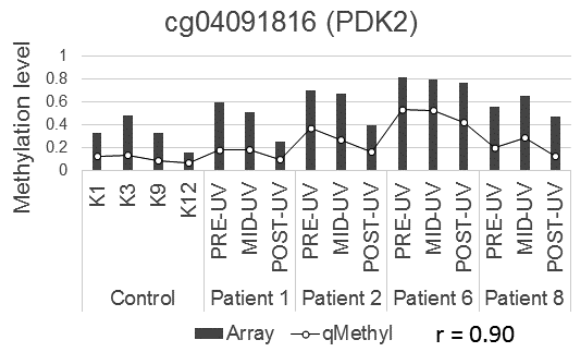

Supplement: jid2015128x1.pdf [file jid2015128x1.pdf]
